1 **Genomic characterization uncovers transmission dynamics of Marburg Virus in Rwanda**

2 **following a single zoonotic spillover event**

3

4 **Yvan Butera**<sup>1,2, &, \*</sup>, **Leon Mutesa**<sup>1,3,4, &, \*</sup>, Edyth Parker<sup>1,5,6</sup>, Raissa Muvunyi<sup>1,7</sup>, Esperance

5 Umumararungu<sup>1,7</sup>, Alisen Ayitewala<sup>1,4</sup>, Jean Pierre Musabyimana<sup>1,7</sup>, Alhaji Olono<sup>1,5</sup>, Placide

6 Sesonga<sup>1,3,4</sup>, Olusola Ogunsanya<sup>1,5</sup>, Emmanuel Kabalisa<sup>1,7</sup>, Oluwatobi Adedokun<sup>1,5</sup>, Nelson

7 Gahima<sup>1,7</sup>, Laetitia Irankunda<sup>1,7</sup>, Chantal Mutezemariya<sup>1,7</sup>, Richard Niyonkuru<sup>1,7</sup>, Arlene

8 Uwituze<sup>1,7</sup>, Ithiel Uwizera<sup>1,7</sup>, James Kagame<sup>1,7</sup>, Arlette Umugwaneza<sup>1,7</sup>, John Rwabuhiri<sup>1,7</sup>,

9 Fidele Umwanankabandi<sup>1,7</sup>, Valens Mbonitegeka<sup>1,7</sup>, Edouard Ntagwabira<sup>1,7</sup>, Etienne Kayigi<sup>1,7</sup>,

10 Gerard Izuwayo<sup>1,7</sup>, Herve Murenzi<sup>1,7</sup>, Therese Mukankwiro<sup>1,7</sup>, Nasson Tuyiringire<sup>1,7</sup>, Jean Marie

11 Vianney Uwimana<sup>1,7</sup>, Agnes Gasengayire<sup>1,7</sup>, Reuben Sindayiheba<sup>1,7</sup>, Glory-Ugochi Onyeugo<sup>1,4</sup>,

12 Merawi Aragaw<sup>1,4</sup>, Lenny Gitundu<sup>1,4</sup>, Radjabu Bigirimana<sup>1,4</sup>, Mosoka Fallah<sup>1,4</sup>, Adaora

13 Ejikeme<sup>1,4</sup>, Senga Sembuche<sup>1,4</sup>, Alice Kabanda<sup>1,4</sup>, Jean Claude Mugisha<sup>1,3,4</sup>, Emmanuel Edwar

14 Siddig Francis<sup>1,4</sup>, Pierre Gashema<sup>1,4</sup>, Jerome Ndayisenga<sup>1,4</sup>, Alexis Rugamba<sup>1,3</sup>, Faustin

15 Kanyabwisha<sup>1,3</sup>, Gad Murenzi<sup>1,3</sup>, Anise Happi<sup>5</sup>, Jean Claude Semuto Ngabonziza<sup>1,7</sup>, Misbah

16 Gashegu<sup>1,7</sup>, Ayman Ahmed<sup>1,4,7</sup>, Noella Bigirimana<sup>1,7</sup>, Edson Rwagasore<sup>1,7</sup>, Muhammed

17 Semakula<sup>1,2</sup>, Jean Paul Rwabihama<sup>1,2,8</sup>, Clarisse Musanabaganwa<sup>1,7</sup>, Eric Seruyange<sup>1,8,9</sup>, Menelas

18 Nkeshimana<sup>1,2</sup>, Theogene Twagirumugabe<sup>1,10</sup>, David Turatsinze<sup>1,11</sup>, Eric Remera<sup>1,7</sup>, Noel

19 Gahamanyi<sup>1,7</sup>, Sofonias Kifle Tessema<sup>1,4</sup>, Isabelle Mukagatare<sup>1,7</sup>, Sabin Nsanzimana<sup>1,2</sup>,

20 **Christian Happi**<sup>1,5,12, §, \*</sup>, **Claude Mambo Muvunyi**<sup>1,7, §, \*</sup>

21

22 *&First authors with equal contribution*

23 *§Last authors with equal contribution*

24

25 <sup>1</sup>*Rwanda Joint Task Force for Marburg Virus Disease Outbreak, Ministry of Health, Rwanda*

26 *Biomedical Centre, Kigali, Rwanda*

27 <sup>2</sup>*Ministry of Health, Kigali, Rwanda*

28 <sup>3</sup>*Center for Human Genetics, College of Medicine and Health Sciences, University of Rwanda,*

29 *Kigali, Rwanda*

30 <sup>4</sup>*Africa Centre for Disease Control and Prevention, Addis Ababa, Ethiopia*

31 <sup>5</sup>*African Center of Excellence for Genomics of Infectious Diseases, Redeemer's University, Ede,*

32 *Osun State, Nigeria*

33 <sup>6</sup>*Department of Immunology and Microbiology, The Scripps Research Institute, La Jolla, CA,*

34 *USA*

35 <sup>7</sup>*Rwanda Biomedical Centre, Kigali, Rwanda*

36 <sup>8</sup>*Department of Internal Medicine, College of Medicine and Health Sciences, University of*

37 *Rwanda, Kigali, Rwanda*

38 <sup>9</sup>*Rwanda Military Referral and Teaching Hospital, Kigali, Rwanda*

39 <sup>10</sup>*Butare University Teaching Hospital, Huye, Rwanda*

40 <sup>11</sup>*Kigali University Teaching Hospital, Kigali, Rwanda*

41 <sup>12</sup>*Department of Immunology and Infectious Diseases, Harvard T H Chan School of Public*

42 *Health, Boston, MA 02115, USA*

43

44

45

46 **\*Corresponding authors**

47 Yvan Butera, MD, PhD

48 Ministry of Health

49 Kigali, Rwanda

50 Email: [yvan.butera@moh.gov.rw](mailto:yvan.butera@moh.gov.rw)

51

52 Leon Mutesa, MD, PhD

53 Centre for Human Genetics

54 College of Medicine and Health Sciences

55 University of Rwanda

56 Kigali, Rwanda

57 Email: [l.mutesa@ur.ac.rw](mailto:l.mutesa@ur.ac.rw)

58

59 Christian Happi, MSc, PhD

60 African Center of Excellence for Genomics of Infectious Diseases,

61 Redeemer's University,

62 Ede, Osun State, Nigeria

63 Email: [happic@run.edu.ng](mailto:happic@run.edu.ng)

64

65 Claude Mambo Muvunyi, MD, PhD

66 Rwanda Biomedical Centre

67 Kigali, Rwanda

68 Email : [claudio.muvunyi@rbc.gov.rw](mailto:claudio.muvunyi@rbc.gov.rw)

69 **Abstract**

70 The ongoing outbreak of Marburg virus disease (MVD) in Rwanda marks the third largest  
71 historically, though it has exhibited the lowest fatality rate. Genomic analysis has identified a  
72 lineage with limited internal diversity most closely related to a genome sequence from a sporadic  
73 case sampled in 2014 in Uganda, though the lineages have diverged from a common ancestor that  
74 was circulating for decades in the animal reservoir.

75 Notably, the data also provide evidence that the outbreak resulted from a single zoonotic  
76 transmission event with limited human-to-human transmission, rather than multiple independent  
77 zoonotic transmission events. The Rwandan MVD outbreak prompted a thorough investigation  
78 that included contact tracing, clinical assessment, travel history, sequencing, and serology testing,  
79 to trace the virus's origin. Results of investigations linked the index case to a mining cave inhabited  
80 by *Rousettus aegyptiacus* (the Egyptian fruit bat), where three individuals tested seropositive for  
81 IgG and IgM, further supporting the zoonotic origin of the outbreak through human-animal  
82 interactions.

83

84 **Background**

85 Since its discovery in 1967, the Marburg virus disease (MVD) has emerged as a significant global  
86 health threat, resulting in several outbreaks characterized by alarmingly high case fatality rates  
87 ranging from 22% to 90% (1). The first reported instances of MVD occurred in simultaneous  
88 outbreaks in Marburg and Frankfurt, Germany, as well as in Belgrade, Yugoslavia (now Serbia)  
89 (2). To date, there have been 19 recorded outbreaks, 563 confirmed cases, and 428 deaths  
90 worldwide (4). On September 27, 2024, Rwanda reported its first ever cases of MVD (5). The

91 ongoing outbreak in Rwanda has confirmed 66 cases, with a case fatality rate of approximately  
92 23% (5).

93  
94 MVD has two distinct variants: Marburg virus (MARV) and Ravn virus (RAVV), with MARV  
95 being the more prevalent variant, responsible for the majority of sporadic MVD outbreaks  
96 worldwide. MARV is a negative-sense single-stranded RNA virus from the Filoviridae family,  
97 similar to Ebola and possesses inverse-complementary 3' and 5' termini (3). MVD is  
98 predominantly a zoonosis, transmitting to humans from either the bat natural reservoir or through  
99 intermediate hosts, including non-human primates. The mechanisms by which bats regulate viral  
100 replication and maintain complex immunity in contrast to humans remain unclear due to a lack of  
101 bat-specific research tools necessary for comparative studies, such as antibodies for flow  
102 cytometry, genomics, and transcriptomics (1,2). Studies confirm that MARV's natural reservoir  
103 is the Egyptian fruit bat (*Rousettus aegyptiacus*) (6). The virus can cause viral hemorrhagic fever  
104 in both humans and primates. However, the precise transmission dynamics between the natural  
105 reservoir and humans or primates are insufficiently understood, though exposure to contaminated  
106 excretions from fruit bats is likely a contributing factor (6). The virus is transmitted from human  
107 to human, particularly through direct contact with body fluids like blood, saliva, semen, and other  
108 body fluids from infected individuals (7).

109  
110 The Marburg viral genome consists of 19,114 nucleotides encoding for seven proteins, including  
111 glycoprotein (GP), nucleoprotein (NP) virion protein 30 (VP30), VP35, VP24, VP40 and large  
112 viral polymerase (3).

113

114 Genomic characterization of MARV strains has revealed substantial genetic diversity across its  
115 global phylogeny, but exhibits limited genomic variation within outbreaks (8).

116 Sequencing of the Marburg genome has provided deeper insights into viral evolution and identified  
117 critical mutation hotspots during adaptation to new hosts, particularly in the VP40 protein and the  
118 NP-VP35 intergenic region (9). These mutations can influence the virus's ability to evade the  
119 immune system, therefore enhancing its pathogenicity.

120

### 121 *Statement of the specific scope of the study*

122 In this study, we used a near real-time genomics sequencing approach to characterize the Marburg  
123 virus in blood samples obtained from patients in the ongoing outbreak in Rwanda. Our aim was to  
124 use the genomic sequencing data to identify and characterize the virus and understand its evolution  
125 and transmission dynamics during the current outbreak. This research underscores the importance  
126 of continuous genomic surveillance which not only facilitates outbreak tracking but also informs  
127 public health strategies for effectively controlling this deadly pathogen.

128

### 129 *Results*

130

131 Phylogenetic analyses support that the outbreak resulted from a single zoonotic transmission event  
132 with limited human-to-human transmission rather than multiple independent zoonotic  
133 transmission events (**Figure 1A**). Multiple independent zoonotic transmissions would have  
134 resulted in a set of more diverged sequences introduced from the genetically diverse viral  
135 population in the reservoir (10). The probable index case was a man in his 20's with an  
136 occupational exposure to fruit bats (*Rousettus aegyptiacus*) in a mining cave environment, who

137 exhibited symptoms highly consistent with the classic clinical presentation of MVD. Additionally,  
138 serological testing of three contacts of the index case exhibited MARV antibodies, further  
139 supporting epidemiological tracing of the index case. The outbreak lineage is most closely related  
140 to a sequence sampled in Kampala, Uganda in September 2014 from a healthcare worker (HCW),  
141 with no secondary cases observed (KP985768). The source of the zoonotic transmission in 2014  
142 was never identified (11). However, the Rwanda-Uganda sister lineages are significantly diverged  
143 from one another, separated by 82 nucleotide substitutions (**Figure 1A**). In Bayesian phylogenetic  
144 reconstructions, we estimate that the two lineages diverged from a common ancestor that circulated  
145 in the animal reservoir in November 2008 [95% highest posterior density, or HPD: May 2007 and  
146 June 2010] (**Supplementary Figure 1 A-B**).

147  
148 The outbreak lineage in Rwanda is nested within a larger clade that includes diversity sampled  
149 from bats in southwestern Uganda from 2007 onwards, along with two human cases identified in  
150 Uganda in 2017 (**Figure 1A, B**). The closest bat virus (JX458855) was sampled from a juvenile  
151 Egyptian fruit bat (*Rousettus Aegyptiacus*) in 2009 from Python Cave in Queen Elizabeth National  
152 Park, a popular tourist attraction in south western Uganda (**Figure 1B**) (6). The lineage in Rwanda  
153 is significantly diverged from JX458855, sharing a common ancestor that likely circulated in the  
154 reservoir as early as June 2006 (95% HPD: December 2004 to November 2007) (**Supplementary**  
155 **Figure 1 A-B**). *Rousettus aegyptiacus* are a cave dwelling species, with spillover events and  
156 limited outbreaks frequently associated with mining activities. This includes outbreaks and  
157 sporadic cases linked to Python cave and the Kitaka mine that is only 50 km away in 2007 and  
158 2008, which both hosts *Rousettus aegyptiacus* colonies of over 50 000 bats. (6,10,12). The  
159 divergent relationship of the Rwandan Marburg virus outbreak lineage indicates that the virus's

160 dispersal through host networks involved larger scale animal movement over a long period of time,  
161 rather than a direct ancestral connection to the *Rousettus aegyptiacus* colony in southwestern  
162 Uganda.  
163

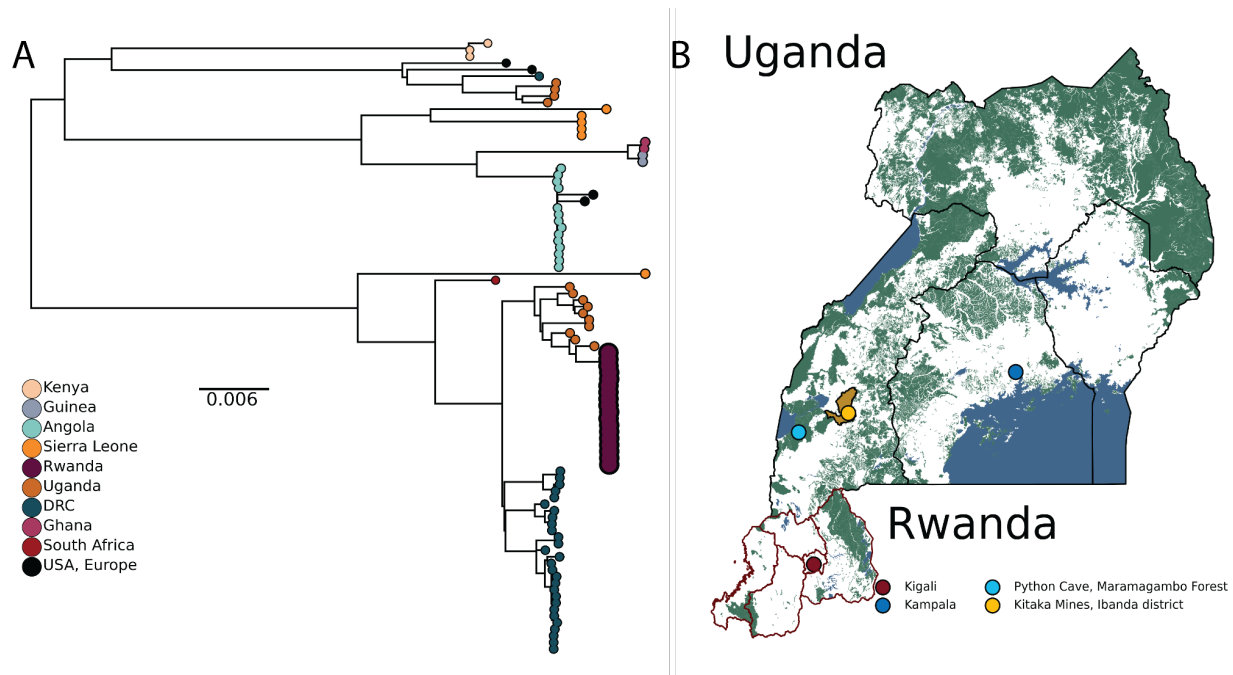

164  
165 **Figure 1:** A) Maximum likelihood phylogeny of the global MARV dataset. Tips are annotated by  
166 country of isolation. This study's tips are relatively enlarged. B) Map of Uganda and Rwanda.  
167 The city of patients in this study (Kigali) is annotated in dark red. Python Cave and Kitaka Mine  
168 in Ibanda district in southwestern Uganda are annotated in light blue and yellow, respectively.

169  
170 The index patient's close relative was admitted to Hospital 1 (H1) at the end of August 2024 but  
171 succumbed to the illness prior to the definitive diagnosis of MVD. It is highly probable that this  
172 patient infected healthcare workers (HCWs) at H1, where MVD was subsequently confirmed at  
173 the end of September 2024. From 22-28 September, 26 cases were reported in HCWs at H1 and  
174 H2, respectively. The limited genetic variation among the outbreak sequences was consistent with



175 a very recent common ancestor, the short sampling period, and previous observations from the  
176 Angola MARV outbreak (**Figure 2A**) (12). A cluster of eight identical sequences was sampled,  
177 spanning the full sampling period (C1 in **Figure 2A, B**). The majority of the C1 sequences were  
178 isolated from healthcare workers (HCWs) at H1 from 22-28 September, with reported symptom  
179 onset as early as mid-September (**Figure 2B**). A C1 sequence was sampled from a HCW at H2 at  
180 the end of September, suggesting infection from an unsampled C1 case in H2 or dissemination  
181 between the two healthcare facilities. There are recorded cases of healthcare workers moving  
182 between healthcare settings H1 and H2. This is further supported by cluster C2, consisting of two  
183 healthcare workers from H1 and H2 respectively that share the synonymous SNP C11070T relative  
184 to C1. Both C2 cases report symptom onset and were sampled in the later weeks of the epidemic.  
185 There are a further seven identical sequences (C4) sampled between H1 and H2 across the full  
186 sampling period that are one synonymous SNP (T10031C) away from C1. C002, a healthcare  
187 worker employed at both H1 and H2, is believed to have acquired the infection at H1. This  
188 individual subsequently became the index case at H2, leading to a nosocomial cluster at H2 and  
189 infections at H1. Overall, there were only three synonymous SNPs observed in the outbreak clade:  
190 A5856G (n=1 sequence), T10031C (n=7), and C11070T (n=2). A5856G and T10031C as well as  
191 C11070T are outside of the CDS of the GP and VP24 genes, respectively. There is therefore no  
192 evidence that post-emergence substitutions enhanced human transmission.

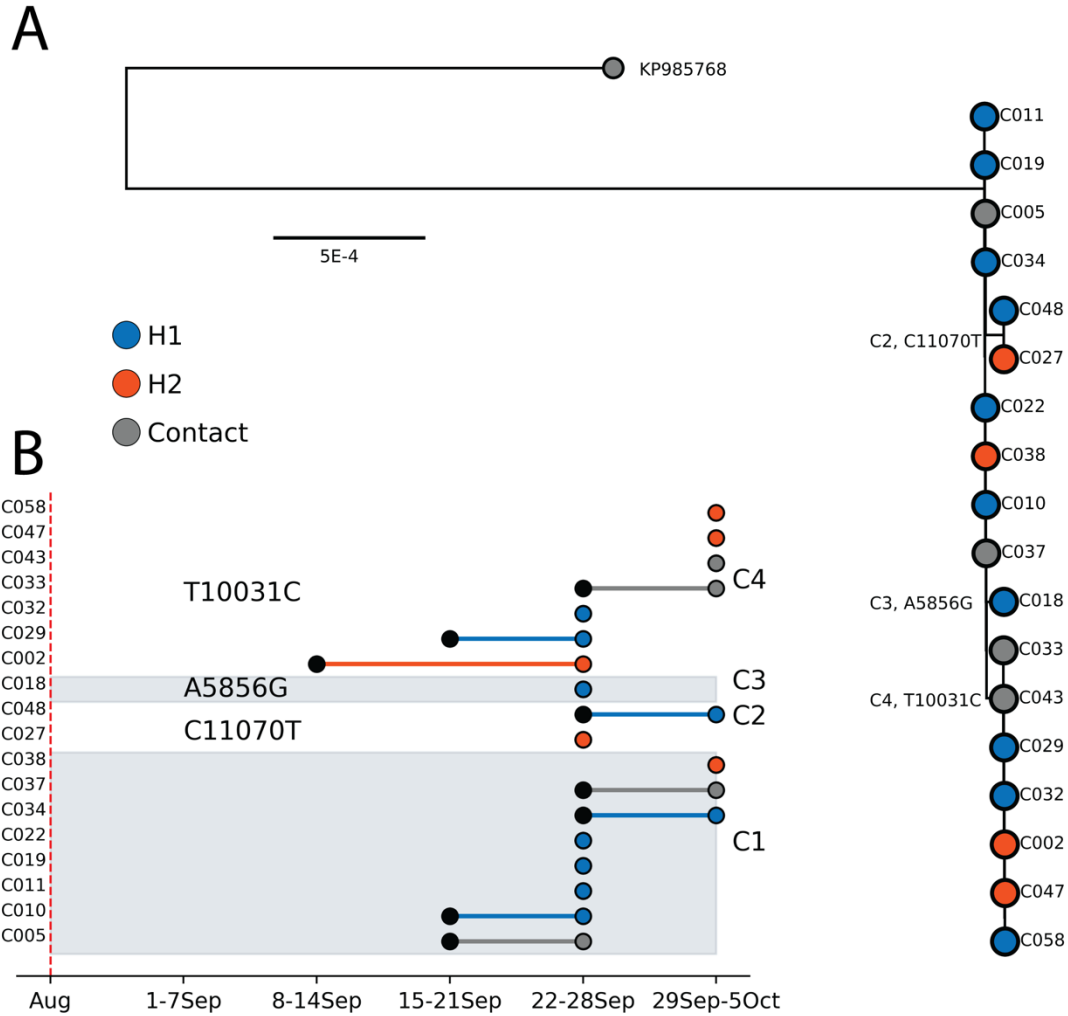

193

194 **Figure 2:** A) Maximum likelihood phylogeny of the outbreak clade, with the Kampala outgroup.

195 Sequences are colored with associated hospital. SNPs reconstructed relative to the common

196 ancestor are annotated in text, as are the clusters defined by the SNP presence. The coordinates

197 are relative to NC\_001608 B) Epidemiological timeline of the sampled sequences in Figure 2A,

198 as annotated on the y-axis. The first black marker, if present, indicates the week of symptom onset

199 if distinct from week of sampling, with the second indicating the week of sampling. Sequences are

200 colored by their associated hospital (H1, H2), and partitioned by SNP presence into clusters, as

201 annotated in text. Red dashed line indicates the contact of the index case admitted to H1.

202

203 An exhaustive investigation of all cases was conducted which led to identifying the index case.  
204 This in-depth process involved a comprehensive collection of diverse data sources including  
205 clinical records, travel history, antibody serology testing results, and contact tracing information.  
206 This evidence revealed that the earliest patient was traced back to a mining cave and exhibited  
207 symptoms highly consistent with the classic clinical presentation of MVD. Additionally, serology  
208 testing results from three contacts linked to the index case exhibited antibodies of persons exposed  
209 to Marburg virus. This suggests that the mining cave may have served as a potential habitat for the  
210 MARV animal reservoir, particularly the fruit bat (*Rousettus aegyptiacus*). Following up on these  
211 findings, the Rwanda Ministry of Health through a multisectoral collaboration launched an  
212 investigation surveillance with the aim of screening fruit bats, mainly cave dwellers, for Marburg  
213 virus (**Supplementary Figures 2 A, B and C**).

214

## 215 ***Discussion***

216 The Rwanda MVD outbreak exhibited substantial human-to-human transmission, primarily  
217 involving healthcare personnel, as is often observed with viral hemorrhagic fever (VHF) outbreaks  
218 closely associated with nosocomial and occupational infections (18). However, Rwanda  
219 effectively contained the spread from further reaching the broader community. Positive cases were  
220 promptly isolated and treated with monoclonal antibodies and antivirals, achieving a favorable  
221 case fatality rate of approximately 23%. This underscores the ongoing need to enhance healthcare  
222 personnel's knowledge and attitudes regarding VHF case management.

223 Through evolutionary and phylogenetic analysis, we observed that the early outbreak sequences  
224 represented very limited genomic variation, indicating that the outbreak originated from a single  
225 zoonotic transmission event. The Rwandan lineage shared a common ancestor with sequences

226 originating from diversity sampled in bats in southwestern Uganda, though the lineages had  
227 diverged over decades in the animal reservoir. It is likely that enhanced zoonotic surveillance will  
228 reveal many unsampled intermediates that can clarify the ecological pathways of transmission  
229 between bat colonies in Uganda and Rwanda. Previous research indicates that bats can harbor  
230 MARV for extended periods, with active mining areas in Rwanda providing ideal habitats for bats  
231 and increasing the likelihood of zoonotic transmission (19).

232  
233 We observed three synonymous single nucleotide polymorphisms (SNPs) outside the coding  
234 regions of the GP and VP24 genes, respectively. Studies have shown that the Marburg virus VP24  
235 protein interacts with the nucleoprotein (NP) and other cellular membranes, facilitating the release  
236 of new virions from infected cells (20). Additionally, research highlights that MARV VP24  
237 directly interacts with the human and bat Keap1 proteins, which modulate antioxidant responses  
238 to support viral replication, a strategy likely critical for viral persistence and host adaptation (21).  
239 Genomic sequencing of MARV in Rwanda has yielded critical insights into viral circulation  
240 dynamics. However, as these SNPs fall outside of coding regions, it is unlikely that they  
241 functionally contribute to enhanced viral fitness on any scale. Our results should be interpreted  
242 within the context of our smaller sample size, which only covers the first two weeks of the  
243 outbreak.

244  
245 This research underscores the importance of continuous genomic surveillance which not only  
246 facilitates outbreak tracking but also informs public health strategies for effectively controlling  
247 this deadly pathogen. In addition, previous research indicates that bats can harbor MARV for  
248 extended periods, with active mining areas in Rwanda providing ideal habitats for bats and

249 increasing the likelihood of zoonotic transmission. Furthermore, Rwanda's location in a region of  
250 consistent turbulent outbreaks, including Ebola, Rift Valley fever, COVID-19, dengue, and  
251 Marburg, underscores the importance of regional and international collaboration to enhance  
252 outbreak preparedness and responses for global health security.

253

254

255 **Reference**

- 256 1. Mehedi M, Groseth A, Feldmann H, Ebihara H. Clinical Aspects of Marburg  
257 Hemorrhagic Fever. *Future Virol* [Internet]. 2011 Sep [cited 2024 Oct 24];6(9):1091–106.  
258 Available from: <https://www.tandfonline.com/doi/full/10.2217/fvl.11.79>  
259
- 260 2. Kilangisa LM, Max BL, Kayuni EA, Shao ER, Mashauri HL. Marburg virus disease:  
261 lesson learned from the first outbreak encounter in Tanzania. *International Journal of Surgery:  
262 Global Health* [Internet]. 2023 Jul [cited 2024 Oct 17];6(4). Available from:  
263 <https://journals.lww.com/10.1097/GH9.0000000000000186>  
264
- 265 3. Paton, A. W., & Paton, J. C. (2018). Detection and characterization of Shiga toxicogenic  
266 *Escherichia coli* by PCR. In D. Liu (Ed.), *Molecular Medical Microbiology* (2nd ed., pp. 213–  
267 239). Academic Press. <https://doi.org/10.1016/B978-0-12-812026-2.00013-X>  
268
- 269 4. Srivastava S, Sharma D, Kumar S, Sharma A, Rijal R, Asija A, et al. Emergence of Marburg  
270 virus: a global perspective on fatal outbreaks and clinical challenges. *Front Microbiol* [Internet].  
271 2023 Sep 13 [cited 2024 Oct 14];14:1239079. Available from:  
272 <https://www.frontiersin.org/articles/10.3389/fmicb.2023.1239079/full>
- 273 5. Ministry of health R. Stop the Marburg virus [Internet]. 2024 Oct. Available from:  
274 [https://x.com/rwandahealth/status/1846968616278778288?s=12&t=HFAKR78RPRo-](https://x.com/rwandahealth/status/1846968616278778288?s=12&t=HFAKR78RPRo-Cmz7j7ciDQ)  
275 [Cmz7j7ciDQ](https://x.com/rwandahealth/status/1846968616278778288?s=12&t=HFAKR78RPRo-Cmz7j7ciDQ)  
276  
277

- 278 6. Amman BR, Carroll SA, Reed ZD, Sealy TK, Balinandi S, Swanepoel R, et al. Seasonal  
279 Pulses of Marburg Virus Circulation in Juvenile *Rousettus aegyptiacus* Bats Coincide with  
280 Periods of Increased Risk of Human Infection. Kawaoka Y, editor. PLoS Pathog [Internet]. 2012  
281 Oct 4 [cited 2024 Oct 18];8(10):e1002877. Available from:  
282 <https://dx.plos.org/10.1371/journal.ppat.1002877>  
283
- 284 7. Amman BR, Schuh AJ, Albariño CG, Towner JS. Marburg Virus Persistence on Fruit as  
285 a Plausible Route of Bat to Primate Filovirus Transmission. Viruses [Internet]. 2021 Nov 30  
286 [cited 2024 Oct 18];13(12):2394. Available from: <https://www.mdpi.com/1999-4915/13/12/2394>  
287
- 288 8. Towner JS, Khristova ML, Sealy TK, Vincent MJ, Erickson BR, Bawiec DA, et al.  
289 Marburgvirus Genomics and Association with a Large Hemorrhagic Fever Outbreak in Angola. J  
290 Virol [Internet]. 2006 Jul [cited 2024 Oct 19];80(13):6497–516. Available from:  
291 <https://journals.asm.org/doi/10.1128/JVI.00069-06>  
292
- 293 9. Wei H, Audet J, Wong G, He S, Huang X, Cutts T, et al. Deep-sequencing of Marburg  
294 virus genome during sequential mouse passaging and cell-culture adaptation reveals extensive  
295 changes over time. Sci Rep [Internet]. 2017 Jun 13 [cited 2024 Oct 19];7(1):3390. Available  
296 from: <https://www.nature.com/articles/s41598-017-03318-3>  
297
- 298 10. Towner JS, Amman BR, Sealy TK, Carroll SAR, Comer JA, Kemp A, et al. Isolation of  
299 Genetically Diverse Marburg Viruses from Egyptian Fruit Bats. Fouchier RAM, editor. PLoS

300 Pathog [Internet]. 2009 Jul 31 [cited 2024 Oct 25];5(7):e1000536. Available from:

301 <https://dx.plos.org/10.1371/journal.ppat.1000536>

302

303 11. Nyakarahuka L, Ojwang J, Tumusiime A, Balinandi S, Whitmer S, Kyazze S, Kasozi S,  
304 Wetaka M, Makumbi I, Dahlke M, Borchert J, Lutwama J, Ströher U, Rollin PE, Nichol ST,  
305 Shoemaker TR. Isolated Case of Marburg Virus Disease, Kampala, Uganda, 2014. *Emerg Infect*  
306 *Dis.* 2017 Jun;23(6):1001-1004. doi: 10.3201/eid2306.170047. PMID: 28518032; PMCID:  
307 PMC5443453

308

309 12. Carroll SA, Towner JS, Sealy TK, McMullan LK, Khristova ML, Burt FJ, et al.  
310 Molecular Evolution of Viruses of the Family Filoviridae Based on 97 Whole-Genome  
311 Sequences. *J Virol* [Internet]. 2013 Mar [cited 2024 Oct 25];87(5):2608–16. Available from:  
312 <https://journals.asm.org/doi/10.1128/JVI.03118-12>

313

314 13. Chen S. Ultrafast one-pass FASTQ data preprocessing, quality control, and deduplication  
315 using fastp. *iMeta* [Internet]. 2023 May [cited 2024 Oct 24];2(2):e107. Available from:  
316 <https://onlinelibrary.wiley.com/doi/10.1002/imt2.107>

317

318 14. Langmead B, Salzberg SL. Fast gapped-read alignment with Bowtie 2. *Nat Methods*  
319 [Internet]. 2012 Apr [cited 2024 Oct 25];9(4):357–9. Available from:  
320 <https://www.nature.com/articles/nmeth.1923>

321



- 322 15. Li H. Minimap2: pairwise alignment for nucleotide sequences. Birol I, editor.  
323 Bioinformatics [Internet]. 2018 Sep 15 [cited 2024 Oct 25];34(18):3094–100. Available from:  
324 <https://academic.oup.com/bioinformatics/article/34/18/3094/4994778>  
325
- 326 16. Grubaugh ND, Gangavarapu K, Quick J, Matteson NL, De Jesus JG, Main BJ, et al. An  
327 amplicon-based sequencing framework for accurately measuring intrahost virus diversity using  
328 PrimalSeq and iVar. Genome Biol [Internet]. 2019 Dec [cited 2024 Oct 25];20(1):8. Available  
329 from: <https://genomebiology.biomedcentral.com/articles/10.1186/s13059-018-1618-7>  
330
- 331 17. Wilm A, Aw PPK, Bertrand D, Yeo GHT, Ong SH, Wong CH, et al. LoFreq: a sequence-  
332 quality aware, ultra-sensitive variant caller for uncovering cell-population heterogeneity from  
333 high-throughput sequencing datasets. Nucleic Acids Research [Internet]. 2012 Dec 1 [cited 2024  
334 Oct 25];40(22):11189–201. Available from:  
335 <https://academic.oup.com/nar/article/40/22/11189/1152727>  
336
- 337 18. Raab, M., Pfadenhauer, L.M., Millimouno, T.J. et al. Knowledge, attitudes and practices  
338 towards viral haemorrhagic fevers amongst healthcare workers in urban and rural public healthcare  
339 facilities in the N'zérékoré prefecture, Guinea: a cross-sectional study. BMC Public Health 20,  
340 296 (2020). <https://doi.org/10.1186/s12889-020-8433-2>  
341
- 342 19. Scarpa F, Bazzani L, Giovanetti M, Ciccozzi A, Benedetti F, Zella D, Sanna D, Casu M,  
343 Borsetti A, Cella E, et al. Update on the Phylodynamic and Genetic Variability of Marburg Virus.  
344 Viruses. 2023; 15(8):1721. <https://doi.org/10.3390/v15081721>

345

346 20. Abir, M. H., Rahman, T., Das, A., Etu, S. N., Nafiz, I. H., Rakib, A., ... Hassan, M. M. (2022).  
347 Pathogenicity and virulence of Marburg virus. *Virulence*, 13(1), 609–633.  
348 <https://doi.org/10.1080/21505594.2022.2054760>

349

350 21. Edwards MR, Johnson B, Mire CE, Xu W, Shabman RS, Speller LN, Leung DW, Geisbert  
351 TW, Amarasinghe GK, Basler CF. The Marburg virus VP24 protein interacts with Keap1 to  
352 activate the cytoprotective antioxidant response pathway. *Cell Rep*. 2014 Mar 27;6(6):1017-1025.  
353 doi: 10.1016/j.celrep.2014.01.043. Epub 2014 Mar 13. PMID: 24630991; PMCID: PMC3985291.

354

355 22. Kazutaka Katoh, Daron M. Standley, MAFFT Multiple Sequence Alignment Software Version  
356 7: Improvements in Performance and Usability, *Molecular Biology and Evolution*, Volume 30,  
357 Issue 4, April 2013, Pages 772–780, <https://doi.org/10.1093/molbev/mst010>

358

359 23. Bui Quang Minh, Heiko A Schmidt, Olga Chernomor, Dominik Schrempf, Michael D  
360 Woodhams, Arndt von Haeseler, Robert Lanfear, IQ-TREE 2: New Models and Efficient Methods  
361 for Phylogenetic Inference in the Genomic Era, *Molecular Biology and Evolution*, Volume 37,  
362 Issue 5, May 2020, Pages 1530–1534, <https://doi.org/10.1093/molbev/msaa015>.

363

364 24. Kalyaanamoorthy, S., Minh, B., Wong, T. *et al.* ModelFinder: fast model selection for accurate  
365 phylogenetic estimates. *Nat. Methods* 14, 587–589 (2017). <https://doi.org/10.1038/nmeth.4285>.

366

367 25. Diep Thi Hoang, Olga Chernomor, Arndt von Haeseler, Bui Quang Minh, Le Sy Vinh,  
368 UFBoot2: Improving the Ultrafast Bootstrap Approximation, *Molecular Biology and Evolution*,  
369 Volume 35, Issue 2, February 2018, Pages 518–522, <https://doi.org/10.1093/molbev/msx281>.

370

371 26. Pavel Sagulenko, Vadim Puller, Richard A Neher, TreeTime: Maximum-likelihood  
372 phylodynamic analysis, *Virus Evolution*, Volume 4, Issue 1, January 2018, vex042,  
373 <https://doi.org/10.1093/ve/vex042>.

374

375 27. Carroll SA, Towner JS, Sealy TK, McMullan LK, Khristova ML, Burt FJ, Swanepoel R, Rollin  
376 PE, Nichol ST. Molecular evolution of viruses of the family Filoviridae based on 97 whole-  
377 genome sequences. *J Virol*. 2013;87:2608–2616. doi: 10.1128/JVI.03118-12.

378

379 28. Bouckaert, R., Heled, J., Kühnert, D., Vaughan, T., Wu, C-H., Xie, D., Suchard, MA.,  
380 Rambaut, A., & Drummond, A. J. (2014). BEAST 2: A Software Platform for Bayesian  
381 Evolutionary Analysis. *PLoS Computational Biology*, 10(4), e1003537.  
382 doi:10.1371/journal.pcbi.1003537.

383

### 384 **Acknowledgments**

385 We gratefully acknowledge the support of the Government of Rwanda and the Ministry of Health,  
386 through the Rwanda Biomedical Center, for facilitating and supporting this sequencing work. We  
387 extend our sincere appreciation to both the African Centre of Excellence for Genomics of  
388 Infectious Diseases (ACEGID) and the Africa Centre for Disease Control and Prevention (Africa

389 CDC) for their invaluable contributions. This work was made possible through the collaborative  
390 efforts of development partners and stakeholders, to whom we are deeply grateful.

391

392 **Funding:** Government of Rwanda and Development Partners.

393

#### 394 **Author contributions**

395 Conceptualization: Y.B, L.M, S.N, C.H, C.M.M, Methodology: Y.B, L.M, A.A, E.U, R.M, E.P,  
396 P.S, C.H, C.M.M Investigation: I.M, E.R, E.K, E.R, N.G Sampling: R.S, P.G, P.S, J.C.M PCR  
397 Experiment: E.K, F.U, V.M, G.I, H.M Sequencing: Y.B, L.M, E.U, L.I, C.M, A.U, I.U, R.N, A.U,  
398 J.K, J.P.M Bioinformatics Analysis: E.P, R.M, J.P.M, N.G, J.R, A.O, C.H Lab Enablement: S.T.K,  
399 A.A, O.O, O.A, A.H, C.M.M Writing- Original Draft: Y.B, L.M, C.M, R.M, J.P.M, P.S Writing  
400 Review and Editing: Y.B, L.M, E.E.S.F, E.R, C.M, M.S, M.N, T.T, D.T, E.S, M.G, J.P.R, J.N,  
401 A.R, F.K, G.M, A.A, S.N, C.H, C.M.M.

402

403 **Diversity, equity, ethics, and inclusion [optional]:** NA

404

405 **Competing interests:** The authors declare no conflicts of interest.

406

#### 407 **Data and code availability**

408 All the sequence data are available upon request on [https://github.com/rbx-bfx/illumina\\_vsp](https://github.com/rbx-bfx/illumina_vsp).

409

#### 410 *Materials and Methods*

#### 411 **Ethics declaration**

412 The study was approved by the Rwanda National Ethics Committee (FWA Assurance No.  
413 00001973 IRB 00001497 of IORG0001100-Protocol approval notice: N° 121/RNEC/2024).

414

#### 415 **Patient sample collection**

416 We obtained whole blood samples from suspected patients presented with clinical symptoms (high  
417 fever, severe headaches, muscle aches, fatigue, nausea, vomiting, and diarrhea) of MDV. Sample  
418 testing was performed at Rwanda Biomedical Centre/National Reference Laboratory whereby  
419 samples were kept in a cold chain prior to plasma separation and analysis.

420

#### 421 **Nucleic acid extraction**

422 Viral RNA was extracted from 140µl plasma using the QIAamp Viral RNA Mini Kit (Qiagen,  
423 Hilden, Germany), following the manufacturer's instructions adapted to the in-house standard  
424 operating procedures with an elution volume of 60µl. The extracted RNA was quantified using a  
425 Qubit fluorometer, and the samples were stored at -80°C until further analysis.

426

#### 427 **RT-PCR and genomic sequencing**

428 For the detection and amplification of the target regions of the MVD, we employed the use of  
429 RealStar® Filovirus Screen RT-PCR Kit 1.0 (Altona Diagnostics, Hamburg, Germany), which is  
430 based on real-time PCR technology, for the qualitative detection and differentiation of Ebola and  
431 Marburg virus specific RNA in human EDTA plasma. The RT-qPCR was conducted following  
432 manufacturer's user guide and performed on CFX96 BIORAD machine. The amplification  
433 followed an initial denaturation at 95°C for 5 minutes, followed by 40 cycles of denaturation at  
434 95°C for 30 seconds, annealing at 55°C for 30 seconds, and extension at 72°C for 1 minute,

435 concluding with a final extension at 72°C for 5 minutes. The amplified products were analyzed via  
436 2% agarose gel electrophoresis to confirm successful amplification and appropriate product size.  
437 Following amplification, library construction was performed on 30 samples using the Illumina  
438 RNA Prep with Enrichment (L) Tagmentation (IRPE) workflow and the Illumina Viral  
439 Surveillance Panel v2 kit (VSP v2 kit). Total RNA extracts were converted to cDNA, tagmented  
440 and thereafter amplified. Genomic region of interest was captured using a hybrid capture method.  
441 Probes were isolated using magnetic pulldown which are selectively enriched for the desired  
442 regions. Enriched libraries were quantified using dsDNA HS assay and Qubit fluorometer.  
443 Libraries were thereafter denatured and normalized at a final loading concentration of 0.8pM.  
444 Paired-end sequencing was performed using a NextSeq 550 with a 300-cycle mid-output cartridge,  
445 with the sequencing depth aimed at a minimum coverage of 100x to ensure robust variant  
446 detection.

447

## 448 **Bioinformatics Analysis**

### 449 **Genome Assembly**

450 We employed a reference-based genome assembly pipeline to analyze the sequencing data  
451 generated using the Illumina Viral Surveillance Panel (VSP) v2 Kit (described above). This  
452 workflow integrates several steps including; quality control, host genome filtering, and viral  
453 genome assembly to accurately reconstruct viral sequences from targeted sequencing.

454 To ensure that only high-quality data were processed downstream, raw sequencing reads were first  
455 processed with *fastp v. 0.23.24 (13)* for trimming adapters and filtering out low-quality bases.  
456 Following this, human host genome sequences were filtered out by aligning the cleaned reads to  
457 the human genome (hg38) using *Bowtie2 v.2.5.4 (14)*. Unmapped reads, presumed to be of viral

458 origin, were retained for downstream analysis. These de-hosted reads were then aligned to a  
459 Marburg virus reference genome (NC\_001608.3) using *Minimap2* v.2.28 (15),  
460 The sequences had 70-97% genomic coverage. We manually masked two mutations in respective  
461 consensus sequences that were adjacent to potential misalignment.

462

### 463 **Variant Calling and Consensus Generation**

464 Variant calling was performed using both *ivar* 1.4.3 (16) and *LoFreq* v.2.1.5 (17). A depth  
465 coverage threshold of 50 reads per nucleotide position was applied to ensure robust and reliable  
466 variant detection. This threshold was also applied to the generation of consensus sequences which  
467 was also done using *ivar* 1.4.3.,

468

### 469 **Phylogenetic**

470 We combined our eighteen higher quality sequences (coverage  $\geq 70\%$ ) with all publicly available  
471 MARV sequences available on Genbank (N=81). To root the tree, we included 8 Ravn virus  
472 sequences included as an outgroup, which were pruned from the tree and excluded in all  
473 subsequent analyses. We aligned the sequences using *Mafft* v 7.52 (22) and reconstructed a  
474 phylogenetic tree using *IQTree* 2.2.5 (23) under modelfinder plus (24), with ultrafast bootstrapping  
475 (25). We performed the initial ancestral state reconstruction using *Treetime* v0.9.3 (26).

476

### 477 **Bayesian phylogenetic reconstruction**

478 The current genomic data does not provide sufficient temporal signal to estimate the rate of  
479 evolution in the outbreak clade. However, we were not interested in estimating the time to the most  
480 recent common ancestor (tMRCA) of the outbreak clade, as determining the emergence timing of

481 the outbreak clade will more likely depend on the epidemiological and contact history of the index  
482 case. We wanted to estimate tMRCA of the outbreak clade and its closest human and zoonotic  
483 outgroups to better understand its potential zoonotic emergence pathway. We therefore  
484 reconstructed the time-resolved phylogeny under a fixed local clock. We assumed a fixed value of  
485  $1e-3$  substitutions per site per year as a plausible rate of evolution for a RNA virus in the early  
486 stage of an outbreak for the defined outbreak clade. We allowed the remainder of the tree to evolve  
487 under a lognormal prior centered on  $5e-4$ . (27) We used a two-phase coalescent model: the tree  
488 from the MRCA (Rwandan lineage) onward was modeled with an exponential growth model, with  
489 the earlier phase modeled as a constant-population size coalescent model. We ran two independent  
490 chains of 100 million states to ensure convergence, discarding the initial 10% of each chain as  
491 burn-in. The chains were then combined with LogCombiner. For all subsequent analyses, we  
492 assessed convergence using Tracer, and constructed a maximum clade credibility (MCC) tree in  
493 TreeAnnotator 1.10 (28).

494

495

496

497

498

499

500

501

502

503

504



505 **Supplemental Figures**

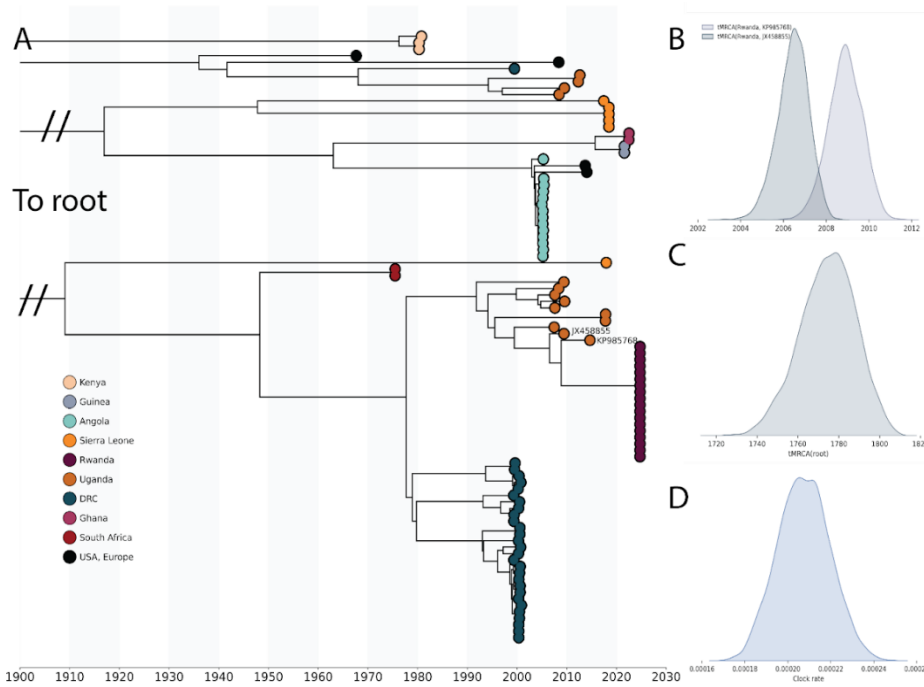

506

507

508 **Supplemental Figure 1:** *A) Time resolved maximum clade credibility tree of global MARV*  
509 *dataset, with closest human (KP985768) and zoonotic (JX458855) sequence to the Rwandan*  
510 *outbreak lineage annotated. B) tMRCA of the Rwandan lineage and KP985768 as well as*  
511 *JX458855 respectively. C) tMRCA of root, which is truncated in A for clarity. D) Estimate clock*  
512 *rate in substitutions per site per year for full tree, excluding the outbreak clade.*

513

514

515

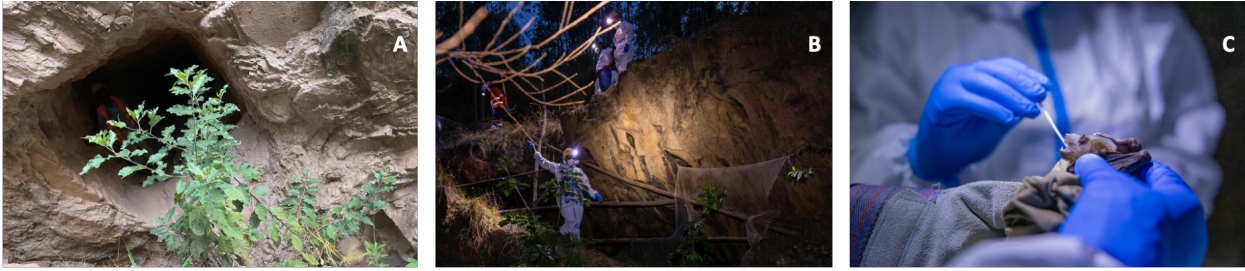

516

517 **Supplemental Figure 2:** *A) Mining cave entrance with human activity; B) Trapping fruit bats*

518 *with net; C) Sampling bats for Marburg virus.*

519

# Figures

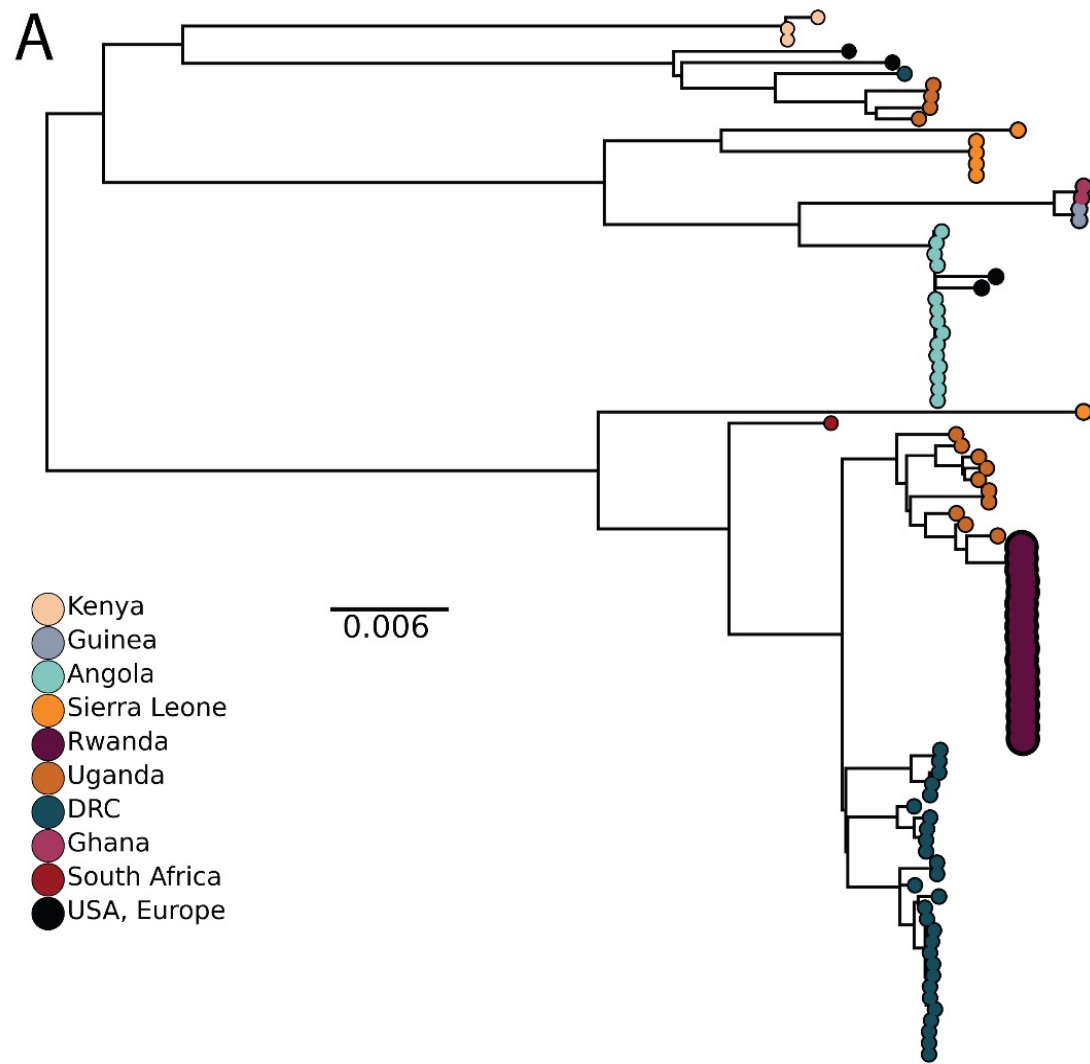

**B Uganda**

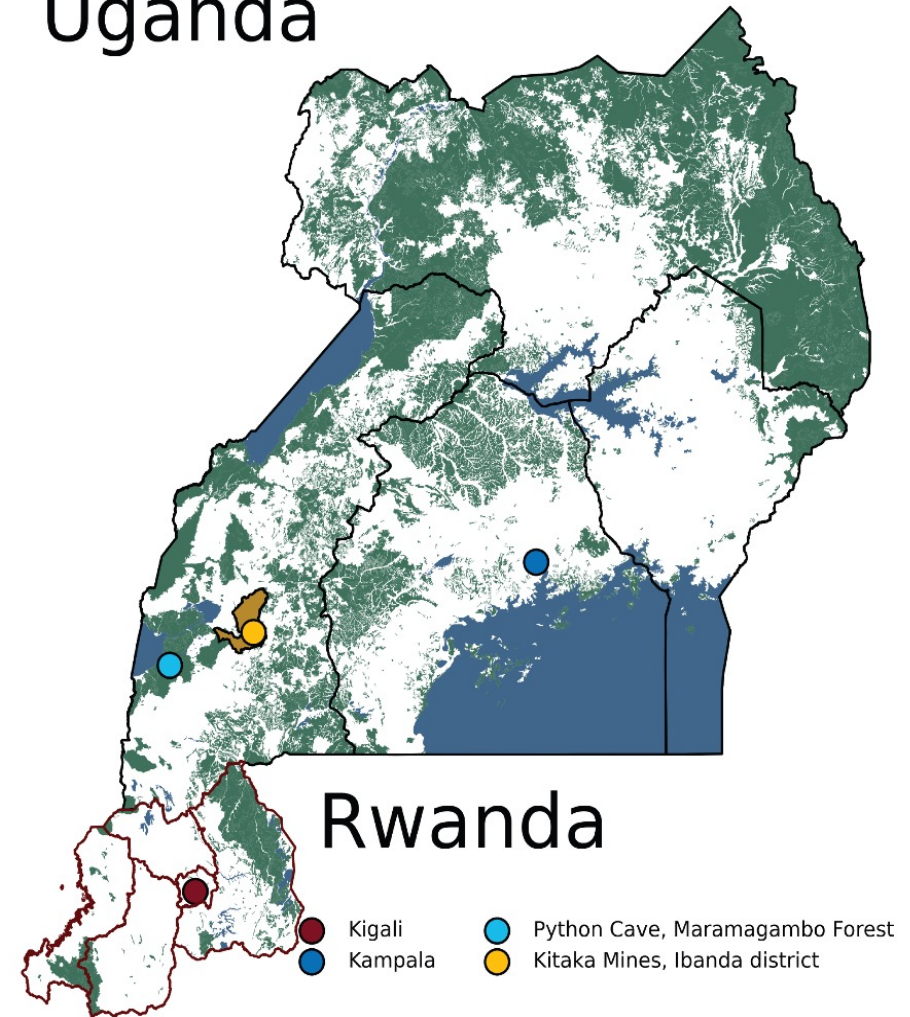

**Figure 1:** A) Maximum likelihood phylogeny of the global MARV dataset. Tips are annotated by country of isolation. This study's tips are relatively enlarged. B) Map of Uganda and Rwanda. The city of patients in this study (Kigali) is annotated in red. Python Cave and Kitaka Mine in Ibanda district in southwest Uganda are annotated in light blue and yellow, respectively.

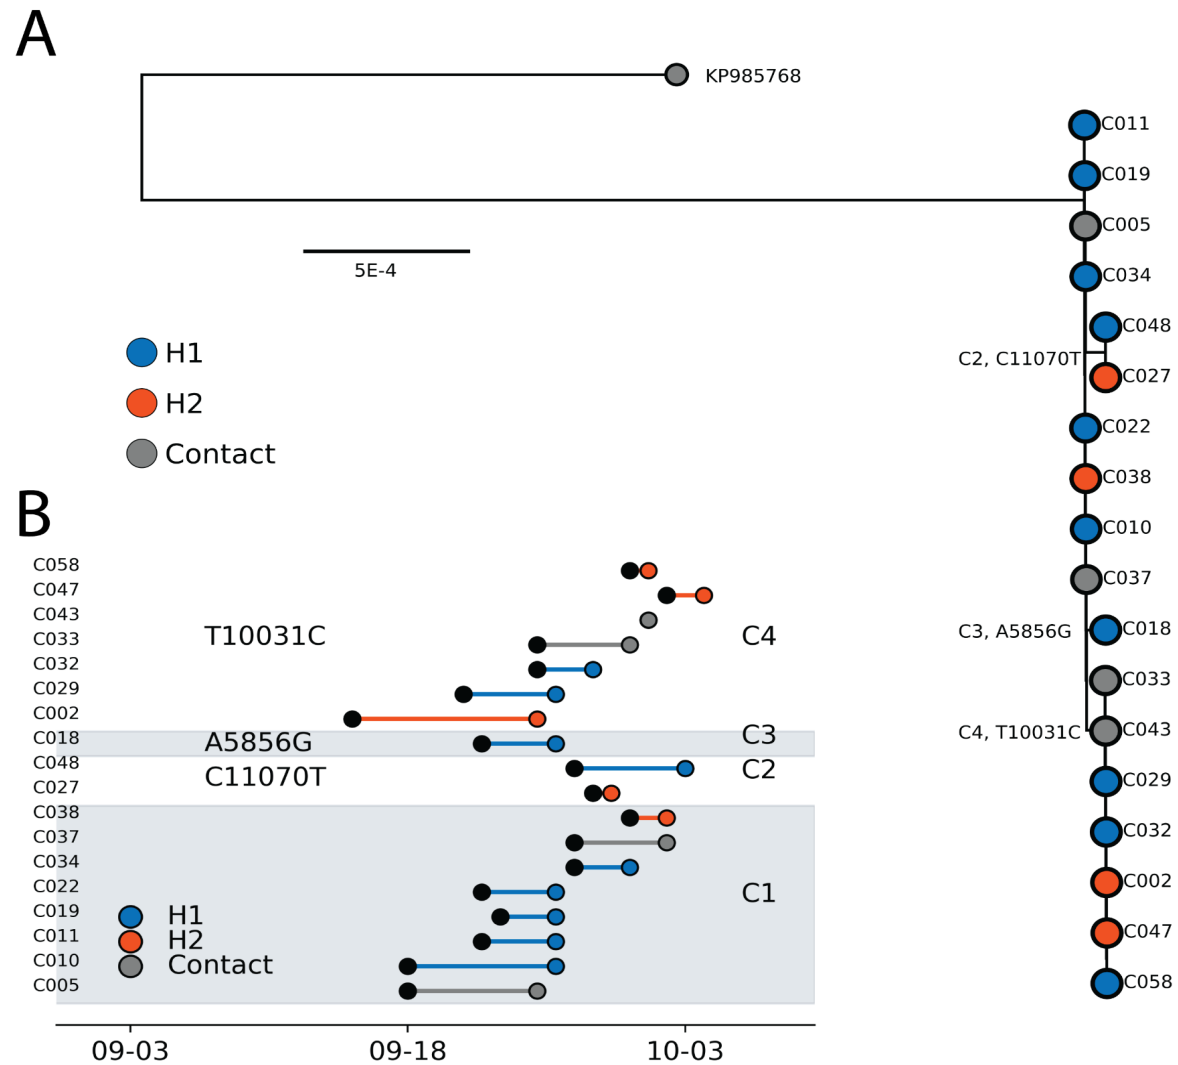

**Figure 2:** A) Maximum likelihood phylogeny of the outbreak clade, with the Kampala outgroup. Sequences are colored with associated hospital. SNPs reconstructed relative to the common ancestor are annotated in text, as are the clusters defined by the SNP presence. The coordinates are relative to NC\_001608 B) Epidemiological timeline of the sampled sequences in Figure 2A, as annotated on the y-axis. The first black marker indicates the date of symptom onset, with the second indicating the date of sampling. Sequences are colored by their associated hospital (H1, H2), and partitioned by SNP presence into clusters, as annotated in text
